# Supplementary material
Source: JCI journal article supplement (doi:10.1172/jci195868)
Supplement: sd1 [file 1]

## Supplemental Data

### Reduced CCL/Be-specific CD4<sup>+</sup> T cells in CCL3-deficient or peptide-MHC II CAR-T cell-treated mice

Michael T. Falta<sup>1#</sup>, Masoom Raza<sup>1#</sup>, Caley J. Nevienski<sup>1</sup>, Tonya Brunetti<sup>2</sup>, Rui Fu<sup>3</sup>, Rebecca M. Tucker<sup>1</sup>, Joseph M. Gaballa<sup>1</sup>, Faiz Minhajuddin<sup>1</sup>, Kibrom M. Alula<sup>1</sup>, Alberto Dinarello<sup>1</sup>, Douglas G. Mack<sup>1</sup>, Allison K. Martin<sup>1</sup>, Joseph Onyiah<sup>1</sup>, Michael Yarnell<sup>4,5</sup>, Prashanth Francis<sup>4</sup>, Terry J. Fry<sup>4,5</sup>, Lisa A. Maier<sup>1,6</sup>, Andrew P. Fontenot<sup>1</sup>, Charles A. Dinarello<sup>1</sup>, Shaikh M. Atif<sup>1\*</sup>

<sup>1</sup> Department of Medicine, University of Colorado Anschutz Medical Campus, Aurora, CO 80045, United States of America

<sup>2</sup> Department of Immunology and Microbiology, University of Colorado Anschutz Medical Campus, Aurora, CO 80045, United States of America

<sup>3</sup> New York Genome Center, New York, NY 10013, United States of America

<sup>4</sup> Department of Pediatrics, University of Colorado Anschutz Medical Campus, Aurora, CO 80045, United States of America

<sup>5</sup> Center for Cancer and Blood Disorders, Children's Hospital Colorado, Aurora, CO 80045, United States of America

<sup>6</sup> Department of Medicine, National Jewish Health, Denver, CO 80206, United States of America

# MTF and MR contributed equally to this work.

## Supplementary Figure Legends

**Supplementary Figure 1. Chemokine gene expression in the BAL fluid of BeO/LPS-treated HLA-DP2 Tg WT and CCL3<sup>-/-</sup> mice.** Mice were intratracheally treated with 3 doses of BeO (100 µg) on days 0, 1, and 2 and a single dose of LPS (10 µg) on day 2. BAL was collected from individual mice on day 3. **(A)** Quantitative PCR (q-RT-PCR) shows fold gene expression of the *Ccl3* and *Ccl4* genes relative to *Gapdh* in the lungs of PBS- or BeO/LPS-treated mice. **(B)** CCL3 and CCL4 protein levels were measured in the BAL fluid by ELISA. The data are representative of the (mean ± SEM) of two independent experiments. 1-way ANOVA was used to determine statistical significance. \*P < 0.01, \*\*\*P < 0.001, \*\*\*\*P < 0.0001.

**Supplementary Figure 2. Control ELISPOT assay.** **(A)** HLA-DP2 Tg WT and CCL3<sup>-/-</sup> mice were exposed to PBS or BeO as described in the Materials and Methods. Lung CD4<sup>+</sup> T cells were purified on day 21 and the treatment and control groups were stimulated *ex vivo* with phytohemagglutinin (1 µg/ml). The ELISPOT data plot shows T cell secretion of IFN-γ represented as spot-forming units (SFUs) per 100,000 purified CD4<sup>+</sup> T cells stimulated overnight. Data represent the mean ± SEM across combined experiments.

**Supplementary Figure 3. IFN-γ and IL-17A-secreting cells are reduced in BeO-exposed CCL3<sup>-/-</sup> mice on day 12.** HLA-DP2 Tg WT and CCL3<sup>-/-</sup> mice were exposed to BeO (100 µg) on days 0, 1, and 2 and treated with LPS (10 µg) on day 8. On day 12, mice were sacrificed 2 minutes after intravascular administration of anti-CD45 mAb. **(A)** Schematic design of the experiment. **(B)** Graph plots show the total number of cells in the lungs of PBS- or BeO/LPS-treated mice. **(C)** Frequency (left) and number (right) of CD4<sup>+</sup> T cells in the lungs were determined on day 21. **(D)** Number of activated (CD44<sup>+</sup>) CD4<sup>+</sup> T cells. **(E-F)** ELISPOT responses for IFN-γ **(E)** and IL-17A **(F)** as spot-forming units (SFUs) per 25,000 purified CD4<sup>+</sup> T cells stimulated with BeSO<sub>4</sub> (100 µM). **(G)** Representative CCR7 expression on gated lung tissue-resident CD4<sup>+</sup> T cells. Solid histograms show unstained cells in grey, PBS-treated WT in yellow, and CCL3<sup>-/-</sup> in peach, BeO-treated WT in brown, and CCL3<sup>-/-</sup> in purple. **(H)** Cumulative frequency of CCR7<sup>+</sup> CD4<sup>+</sup> T cells in the lungs of BeO-exposed mice. Error bars represent the mean ± SEM. 1-way ANOVA determined statistical significance. \*P < 0.05, \*\*P < 0.01, \*\*\*P < 0.001, \*\*\*\*P < 0.0001.

**Supplementary Figure 4. Enhanced CD4<sup>+</sup> T cell responses in *A. nidulans* exposed HLA-DP2 Tg WT and CCL3<sup>-/-</sup> mice.** Both WT and CCL3<sup>-/-</sup> mice were exposed to *A. nidulans* (1x10<sup>8</sup>) spores/conidia on day 0, and the mice were sacrificed on day 14. A fluorescently labeled anti-CD45 mAb was injected intravenously 2 minutes before sacrifice to distinguish tissue-specific cells from circulating cells. On day 14, **(A)** flow cytometry plots show the frequency of CD4<sup>+</sup> T cells in the lungs of PBS or *A. nidulans*-exposed mice. **(B)** Graph plots show the frequency and number of CD4<sup>+</sup> T cells in the lungs of *A. nidulans*-exposed mice. Data are representative of the mean ± SEM of two independent experiments. 1-way ANOVA was used to determine statistical significance. \*P < 0.05, \*\*P < 0.01.

**Supplementary Figure 5. Tetramer specificity validation.** HLA-DP2-CCL4/Be and HLA-DP2-CLIP tetramer staining of (A) T cell hybridoma 8845-c3 that expresses a human TCR specific for the CCL4/Be neoantigen and restricted by HLA-DP2, and (B) gated CD4<sup>+</sup> T cells from the lungs of HLA-DP2 Tg mice, exposed to BeO under the standard regimen. Both tetramers were used at a final concentration of 20 µg/ml.

**Supplementary Figure 6. Phenotypic and functional analysis of BeO-exposed lung tissue-resident CD4<sup>+</sup> T cells.** HLA-DP2 Tg FVB/N (WT) mice were intratracheally exposed to BeO (100 µg) on days 0, 1, 2, 14, 15, 18, and 19 and a single dose of LPS (10 µg) on day 14. On day 21, mice were injected intravenously with anti-CD45 mAb (5 µg/mouse) 2 minutes before sacrifice. Single cells were prepared from the lungs and stimulated with BeSO<sub>4</sub> (75 µM) for 4h in the presence of Brefeldin A (1X). The cells were stained with HLA-DP2-CCL4/Be tetramer (20 µg/ml) for 2h as described in the Materials and Methods. Subsequently, the cells were surface-stained, followed by intracellular staining to detect functional molecules. (A) Flow cytometric plots show cell surface expression of PD-1, CD44, and CD62L molecules and intracellular staining of proliferation marker, Ki-67, and the functional molecules, IFN-γ, TNF-α, and IL-17A. Histogram colors represent FMO control (grey), CD44<sup>-</sup>Tet<sup>-</sup> CD4<sup>+</sup> T cells (DN, green), CD44<sup>+</sup>Tet<sup>-</sup> CD4<sup>+</sup> T cells (Tet<sup>-</sup>, Red), and CD44<sup>+</sup>Tet<sup>+</sup> CD4<sup>+</sup> T cells (Tet<sup>+</sup>, blue). (B) Bar graphs show the mean fluorescence intensity (MFI) of cell-surface and intracellular molecules for the various CD4<sup>+</sup> T cell subsets in the lungs of BeO-exposed mice. Data are representative of two independent experiments. 1-way ANOVA was used to determine statistical significance. \*P < 0.05, \*\*P < 0.01, \*\*\*P < 0.001, \*\*\*\*P < 0.0001.

**Supplementary Figure 7. BeO-exposure induced single or dual specificity antigen-specific (CCL3 and 4) CD4<sup>+</sup> T cells in the lungs.** HLA-DP2 Tg mice (n=10) were sensitized and boosted with BeO (100 µg) on days 0, 1, 2, 14, 15, 18, and 19 and a single dose of LPS (10 µg) on day 14. On day 21, lung cells were stained with HLA-DP2-CCL3/Be and HLA-DP2-CCL4/Be tetramers labeled with different fluorophores. (A) Pseudocolor flow cytometry plots show representative DP2-CCL3/Be (left), and DP2-CCL4/Be (right) tetramer binding of CD4<sup>+</sup>CD44<sup>+</sup> lung T cells. (B) Representative HLA-DP2 tetramer co-staining of lung CD4<sup>+</sup> T cells from BeO/LPS-exposed mice. (C) Summary of the overall percentage of lung CD4<sup>+</sup> T cells that bind individual tetramers, or are cross-reactive, i.e., bind both CCL/Be tetramers.

**Supplementary Figure 8. Presence of CD4<sup>+</sup> T cells in the lungs of BeO/LPS-exposed mice treated with or without CAR-T cells.** HLA-DP2 Tg mice were exposed to BeO on days 0, 1, 2, 14, 15, 18, and 19, and LPS (10 mg/ml) on day 14. Treated mice were given PBS or adoptively transferred with either control, DR-α-CAR-T cells, or CCL4/Be-CAR-T cells on day 8. Mice were sacrificed and examined on day 21. The frequency (left) and number (right) of CD4<sup>+</sup> T cells in the lungs of exposed mice are shown. Data are shown as mean ± SEM, pooled from two independent experiments. 1-way ANOVA was used to determine statistical significance. \*\*\*P < 0.001, \*\*\*\*P < 0.0001.
